# Supplementary material for: Translation and adaptation of the STOPP-START screening tool to Portuguese for detecting inappropriate prescriptions in older people: a protocol
Source: HighWire-hosted journal article supplement (doi:10.1136/bmjopen-2020-043746), 2021-06-01
Supplement: bmjopen-2020-043746supp001_data_supplement.pdf [file bmjopen-2020-043746supp001_data_supplement.pdf]

## Appendix I Timeline

|                                                                | 2021 |   |   |   | 2022 |   |   |   | 2023 |   |   |   |
|----------------------------------------------------------------|------|---|---|---|------|---|---|---|------|---|---|---|
| Tasks/Trimester                                                | 1    | 2 | 3 | 4 | 1    | 2 | 3 | 4 | 1    | 2 | 3 | 4 |
| <b>Phase I</b><br>Translation to the Portuguese language       |      |   |   |   |      |   |   |   |      |   |   |   |
| <b>Phase II</b><br>Data collection                             |      |   |   |   |      |   |   |   |      |   |   |   |
| <b>Phase III</b><br>Intrarater reliability and agreement study |      |   |   |   |      |   |   |   |      |   |   |   |
| <b>Phase IV</b><br>Interrater reliability and agreement study  |      |   |   |   |      |   |   |   |      |   |   |   |
