# Supplementary material for: Translation and adaptation of the STOPP-START screening tool to Portuguese for detecting inappropriate prescriptions in older people: a protocol
Source: HighWire-hosted journal article supplement (doi:10.1136/bmjopen-2020-043746), 2021-06-01
Supplement: bmjopen-2020-043746supp002_data_supplement.pdf [file bmjopen-2020-043746supp002_data_supplement.pdf]

Appendix II - list of diseases that will be collected by the main investigator in phase II for each patient.

| Current or past conditions/diseases                                                          |
|----------------------------------------------------------------------------------------------|
| Heart failure and heart block as determined by New York Heart Association Classification     |
| Supraventricular tachyarrhythmia                                                             |
| Hypertension                                                                                 |
| Liver failure                                                                                |
| Nephrotic syndrome or renal failure                                                          |
| History of gout                                                                              |
| Urinary incontinence                                                                         |
| Angina                                                                                       |
| History of peptic ulcer disease                                                              |
| Bleeding diathesis                                                                           |
| Recent non-trivial spontaneous bleeding                                                      |
| Stroke                                                                                       |
| Acute coronary syndrome                                                                      |
| Coronary stent(s) inserted                                                                   |
| Carotid arterial stenosis                                                                    |
| Atrial fibrillation                                                                          |
| Coronary, cerebrovascular or peripheral arterial disease                                     |
| Deep venous thrombosis                                                                       |
| Thrombophilia                                                                                |
| Dementia                                                                                     |
| Narrow angle glaucoma                                                                        |
| Cardiac conduction abnormalities                                                             |
| Prostatism or prior history of urinary retention                                             |
| Depression                                                                                   |
| Parkinsonism or Lewy Body Disease                                                            |
| Delirium                                                                                     |
| Psychosis                                                                                    |
| Benign essential tremor                                                                      |
| Erosive peptic oesophagitis                                                                  |
| Constipation                                                                                 |
| Chronic obstructive pulmonary disease                                                        |
| Bladder outflow obstruction                                                                  |
| Asthma                                                                                       |
| Acute or chronic respiratory failure                                                         |
| Osteoarthritis                                                                               |
| Rheumatoid arthritis                                                                         |
| Upper gastrointestinal disease                                                               |
| Chronic cognitive impairment with symptomatic orthostatic hypotension or micturition syncope |
| Type 2 diabetes mellitus                                                                     |
| Hypoglycaemic episodes                                                                       |
| History of breast cancer                                                                     |
| Venous thromboembolism                                                                       |
| Primary or secondary hypogonadism                                                            |
| Documented chronic hypoxaemia                                                                |
| Parkinson's disease                                                                          |
| Alzheimer's dementia                                                                         |
| Restless legs syndrome                                                                       |
| Iron deficiency                                                                              |
| Gastro-oesophageal reflux disease                                                            |
| Osteoporosis and/or previous fragility fracture                                              |
| Symptomatic atrophic vaginitis                                                               |
